# Supplementary material
Source: Springer Nature journal article supplement (https://www.springermedizin.de/resource/supplementary/12875_2011_700_MOESM2_ESM.pdf/9435208)

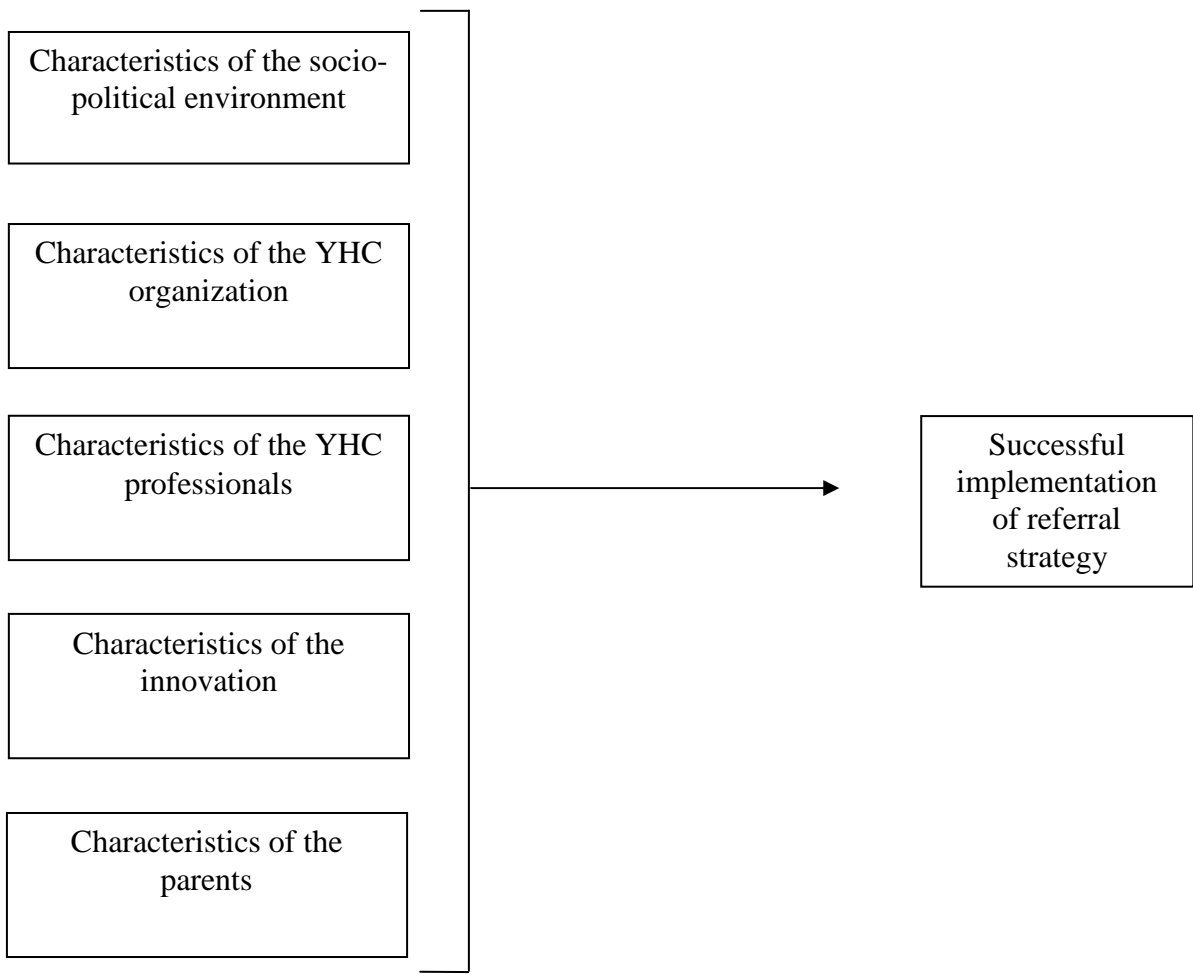

Supplement: MOESM2 [file 9435208]
